# Supplementary material for: Key factors for high-quality residency training programs: Insights from program directors through thematic analysis
Source: Research Square preprint supplement (doi:10.21203/rs.3.rs-7030199/v1), 2025-11-04
Supplement: Supplementary file 1 [file 4668f4e97bc55b650bfea963.docx]

Supplementary file 1. Interview guide

1. Could you explain the specific content of emergency department training for resident physicians?
2. What aspects of your clinical training program do you think are related to the high accuracy rates on patient simulation video questions?
3. How do supervising physicians provide feedback on case presentations, examination findings, and clinical reasoning? Specifically, do supervising physicians accompany residents to the bedside for double-checking examination findings?
4. What resources do you use for teaching diagnostic reasoning? Could you specify any particular books, journals, or online resources?
